# Supplementary material
Source: Research Square preprint supplement (doi:10.21203/rs.3.rs-9242709/v1)
Supplement: Supplementary file 1 [file c40439bf63bd57944548f08e.docx]

**Design, Synthesis and Computational Analysis of 4-Amino-1,2,4-Triazol-3-one Schiff Base Derivatives as Potent α-Glucosidase Inhibitors**

Emmanuel Oloruntoba Yeyea,f, Damilare D. Babatunde b,c,*, Ejike Onwudiegwu Okpalad,f , Dolapo L. Ashiru d,Ernestine Akorlore, Nomampondo P. Magwa b

a Chemistry Department, Faculty of Science, University of Ibadan, Nigeria.

b Department of Chemistry, University of South Africa, Florida Science Campus, Johannesburg, 1709, South Africa.

c Centre for Materials Science, University of South Africa, Florida, 1710, Johannesburg, South Africa

d Department of Chemistry, Faculty of Science, Federal University Lokoja, Kogi State, Nigeria.

e Clemson University, South Carolina, Clemson USA.

f H. E. J. Research Institute of Chemistry, International Center for Chemical and Biological Sciences, University of Karachi, Karachi 75270, Pakistan

*corresponding author: Damilare D. Babatunde and Nomampondo P. Magwa

**Supplementary Information**

**Figure 11a: Proton NMR Spectrum of compound 1**

**Figure 11b: EI-MS Spectrum of compound 1**

**Figure 12a: Proton NMR Spectrum of compound 2**

**Figure 12b: EI-MS Spectrum of compound 2**

**Figure 13a: Proton NMR Spectrum of compound 3**

**Figure 13b: EI-MS Spectrum of compound 3**

**Figure 14a: Proton NMR Spectrum of compound 4**

**Figure 14b: EI-MS Spectrum of compound 4**

**Figure 15a: Proton NMR Spectrum of compound 5**

**Figure 15b: EI-MS Spectrum of compound 5**

**Figure 16a: Proton NMR Spectrum of compound 6**

**Figure 16b: EI-MS Spectrum of compound 6**

**Figure 17a: Proton NMR Spectrum of compound 7**

**Figure 17b: EI-MS Spectrum of compound 7**

**Figure 18a: Proton NMR Spectrum of compound 8**

**Figure 18b: EI-MS Spectrum of compound 8**

**Figure 19a: Proton NMR Spectrum of compound 9**

**Figure 19b: EI-MS Spectrum of compound 9**

**Figure 20a: Proton NMR Spectrum of compound 10**

**Figure 20b: EI-MS Spectrum of compound 10**
